# Supplementary figures and images for: Quantitative Proteomic Analysis Reveals apoE4-Dependent Phosphorylation of the Actin-Regulating Protein VASP
Source: PubMed Central journal article supplement — Mol Cell Proteomics. 2023 Apr 4;22(5):100541. doi: 10.1016/j.mcpro.2023.100541 (PMC10196575; doi:10.1016/j.mcpro.2023.100541), 2023-04-04

# Supplementary Figure 1.

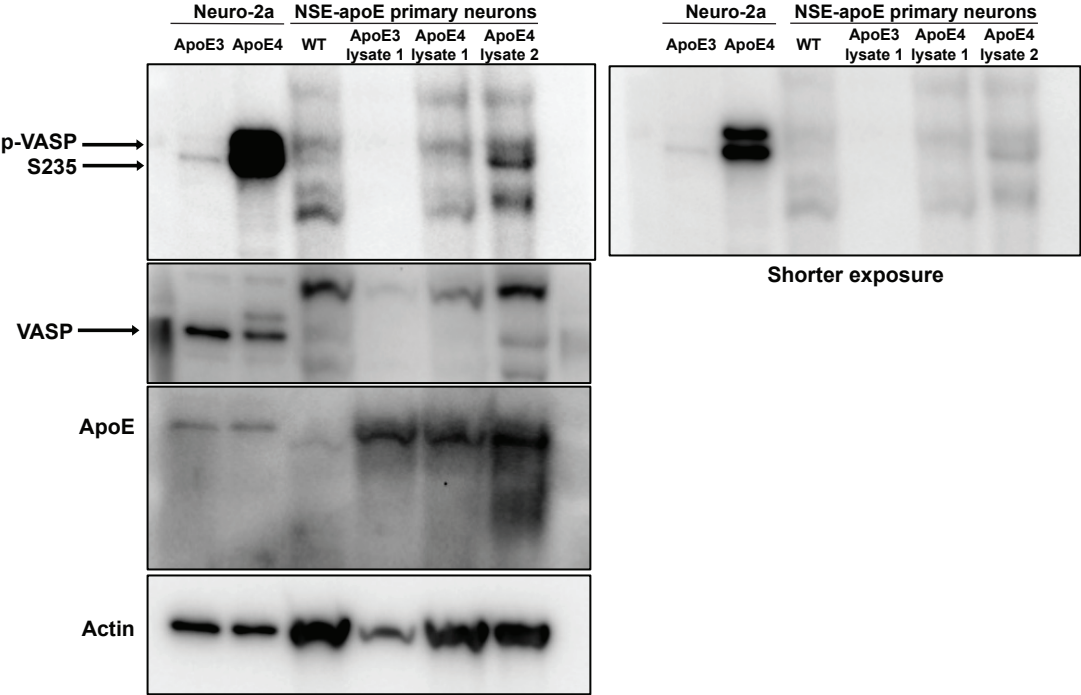

Supplement: mmc1.pdf [file mmc1.pdf]

# Supplementary Figure 2.

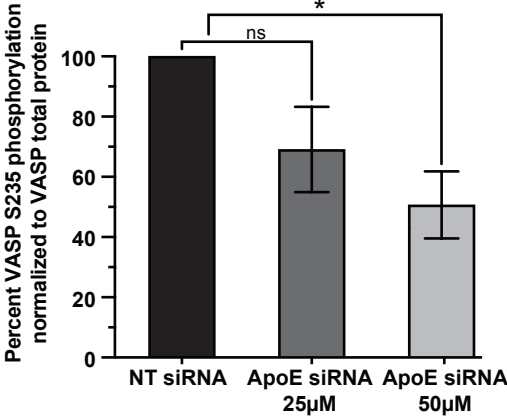

Supplement: mmc2.pdf [file mmc2.pdf]

# Supplementary Figure 3.

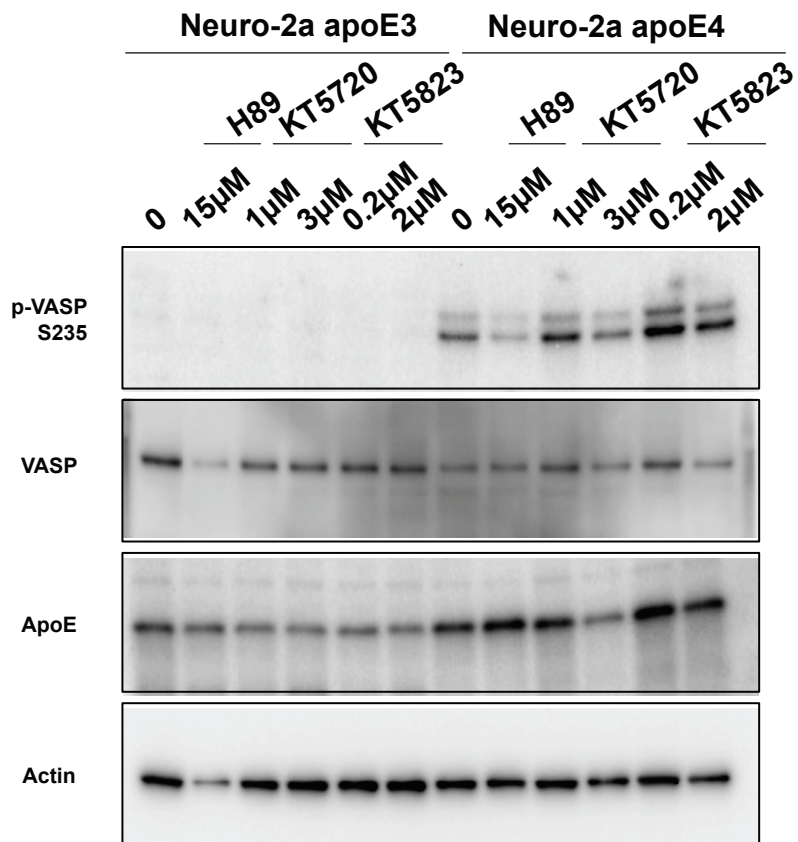

Supplement: mmc3.pdf [file mmc3.pdf]

# Supplementary Figure 4.

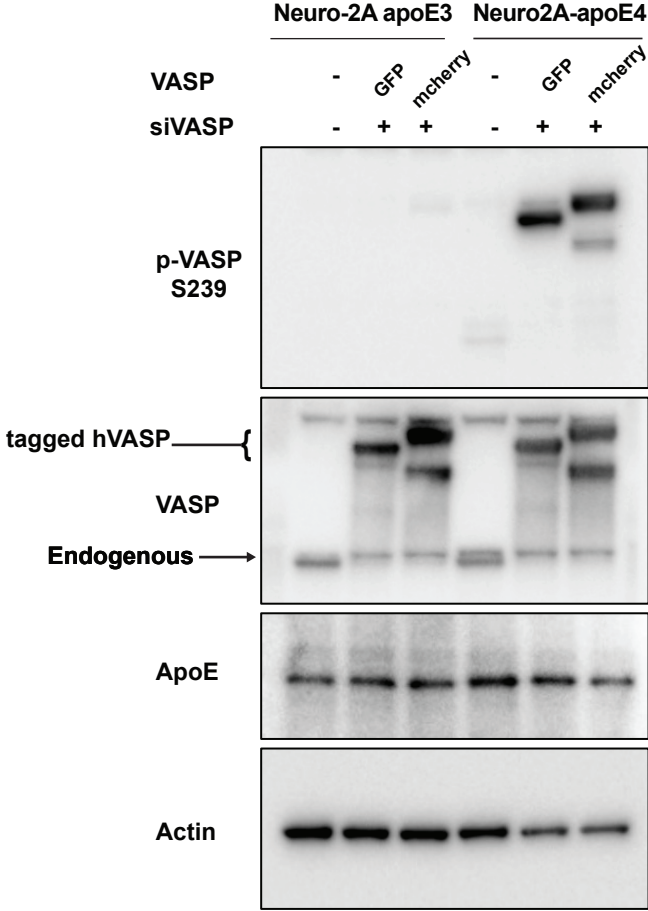

Supplement: mmc4.pdf [file mmc4.pdf]
